# Supplementary material for: Long-Term Brain Structure and Cognition Following Bariatric Surgery
Source: PubMed Central journal article supplement (PMC10858407; doi:10.1001/jamanetworkopen.2023.55380), 2024-02-09
Supplement: jamanetwopen-e2355380-s002.pdf [file jamanetwopen-e2355380-s002.pdf]

## Data Sharing Statement

Custers. Long-Term Brain Structure and Cognition Following Bariatric Surgery. *JAMA Netw Open*. Published February 09, 2024. doi:10.1001/jamanetworkopen.2023.55380

### Data

**Data available:** No
